# Supplementary material
Source: MDPI journal article supplement (https://www.mdpi.com/2073-4395/10/4/546)
Supplement: s1 [file s1]

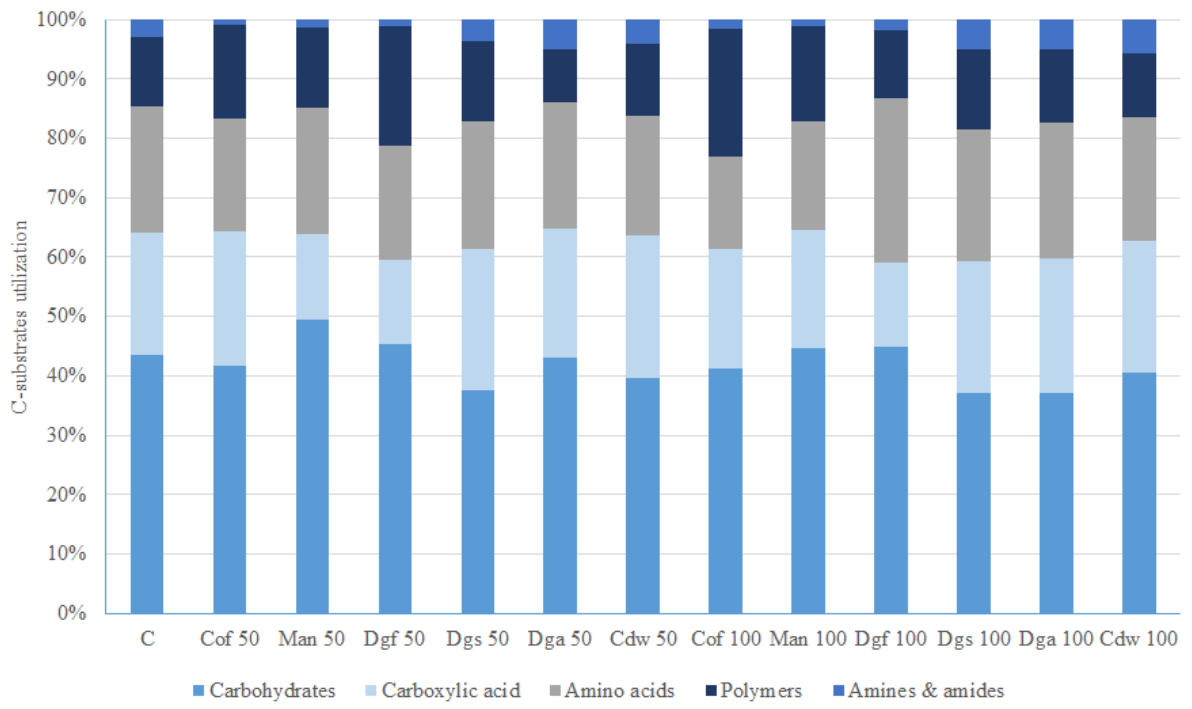

(a)

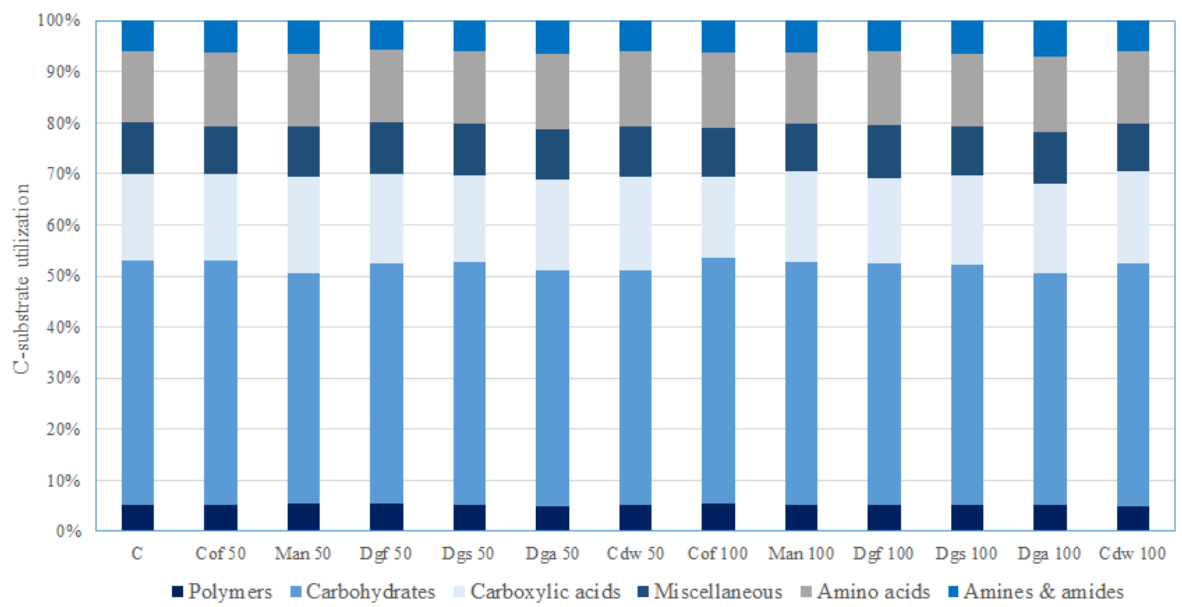

(b)

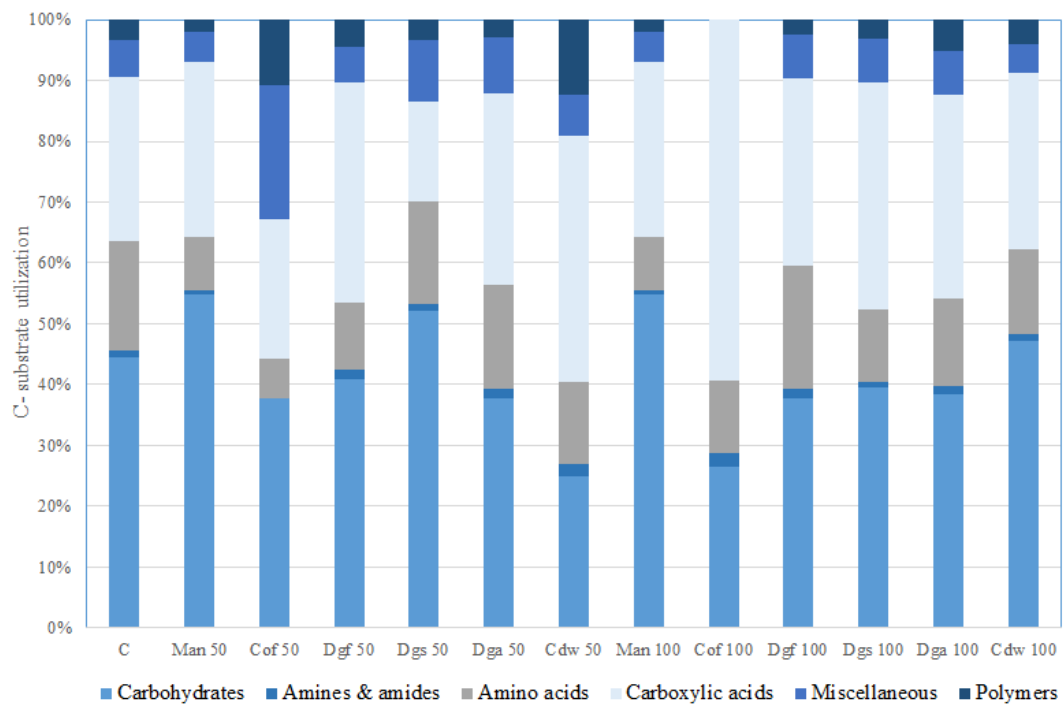

(c)

**Figure S1.** Percentage of utilization of carbon substrate on Biolog (a) ECO plate, (b) FF plate, (c) AN plate.

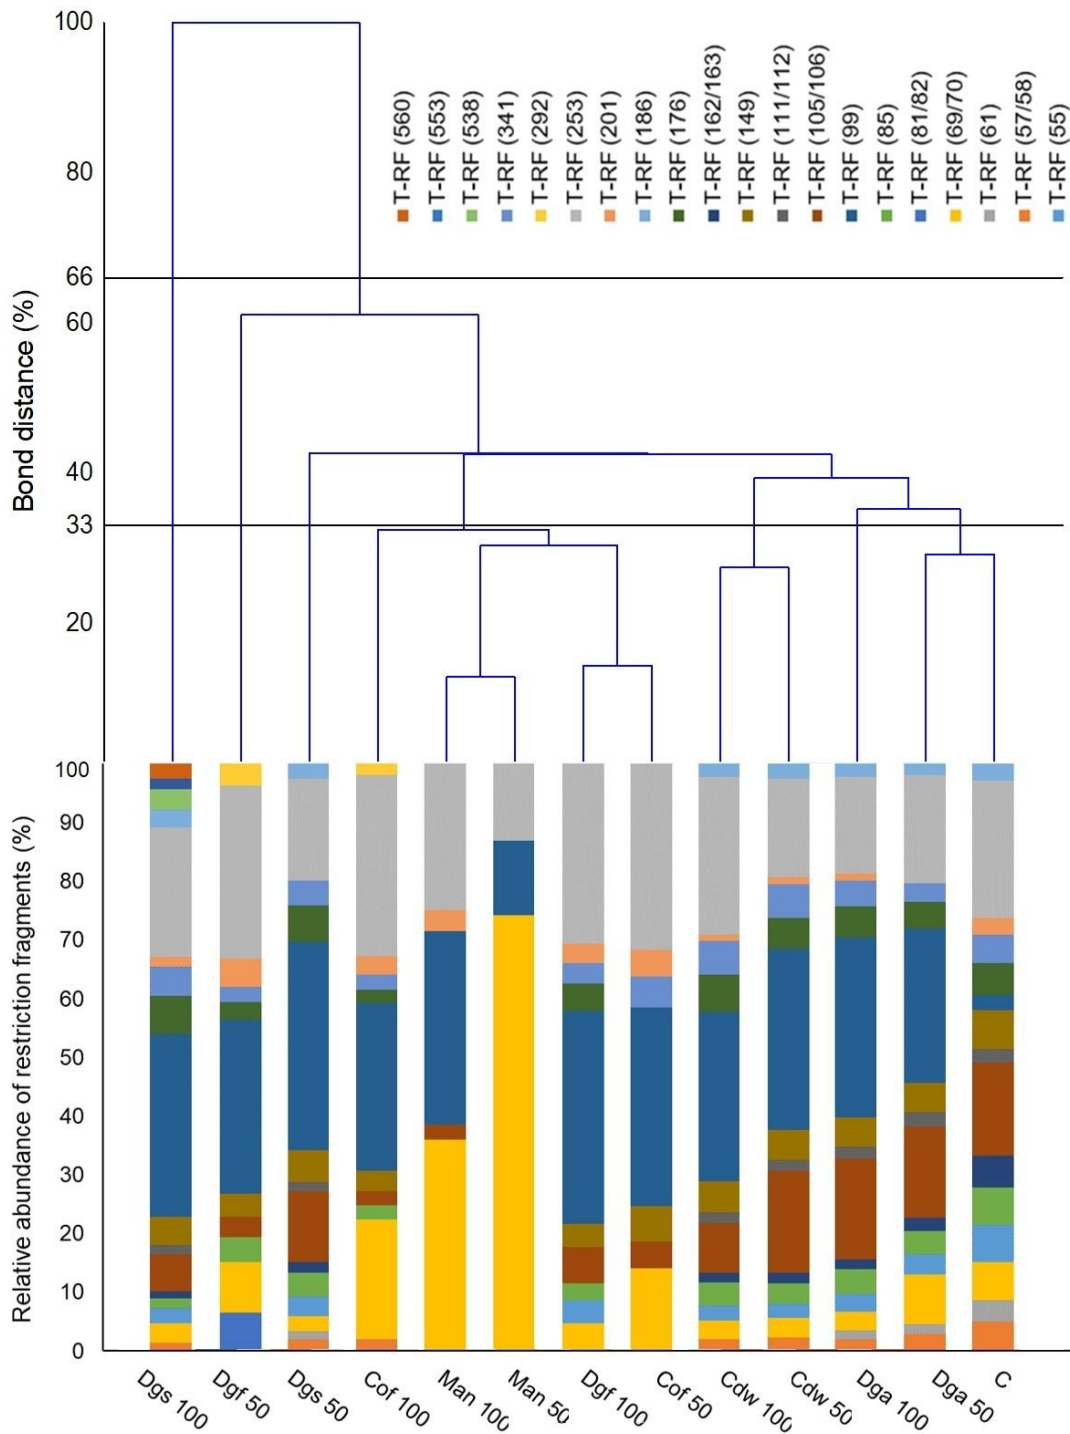

**Figure S2.** T-RFLP dendrogram was obtained using *AluI* enzyme digested of *amoA* archaeal gene amplification product. Explanation: C- control, Cof – compost, Man – animal meal, Dgf – digestate from potato waste, Dgs – digestate from sugar beet waste, Dga – digestate from silage maize, Cdw- compost, 50% and 100% of doses.

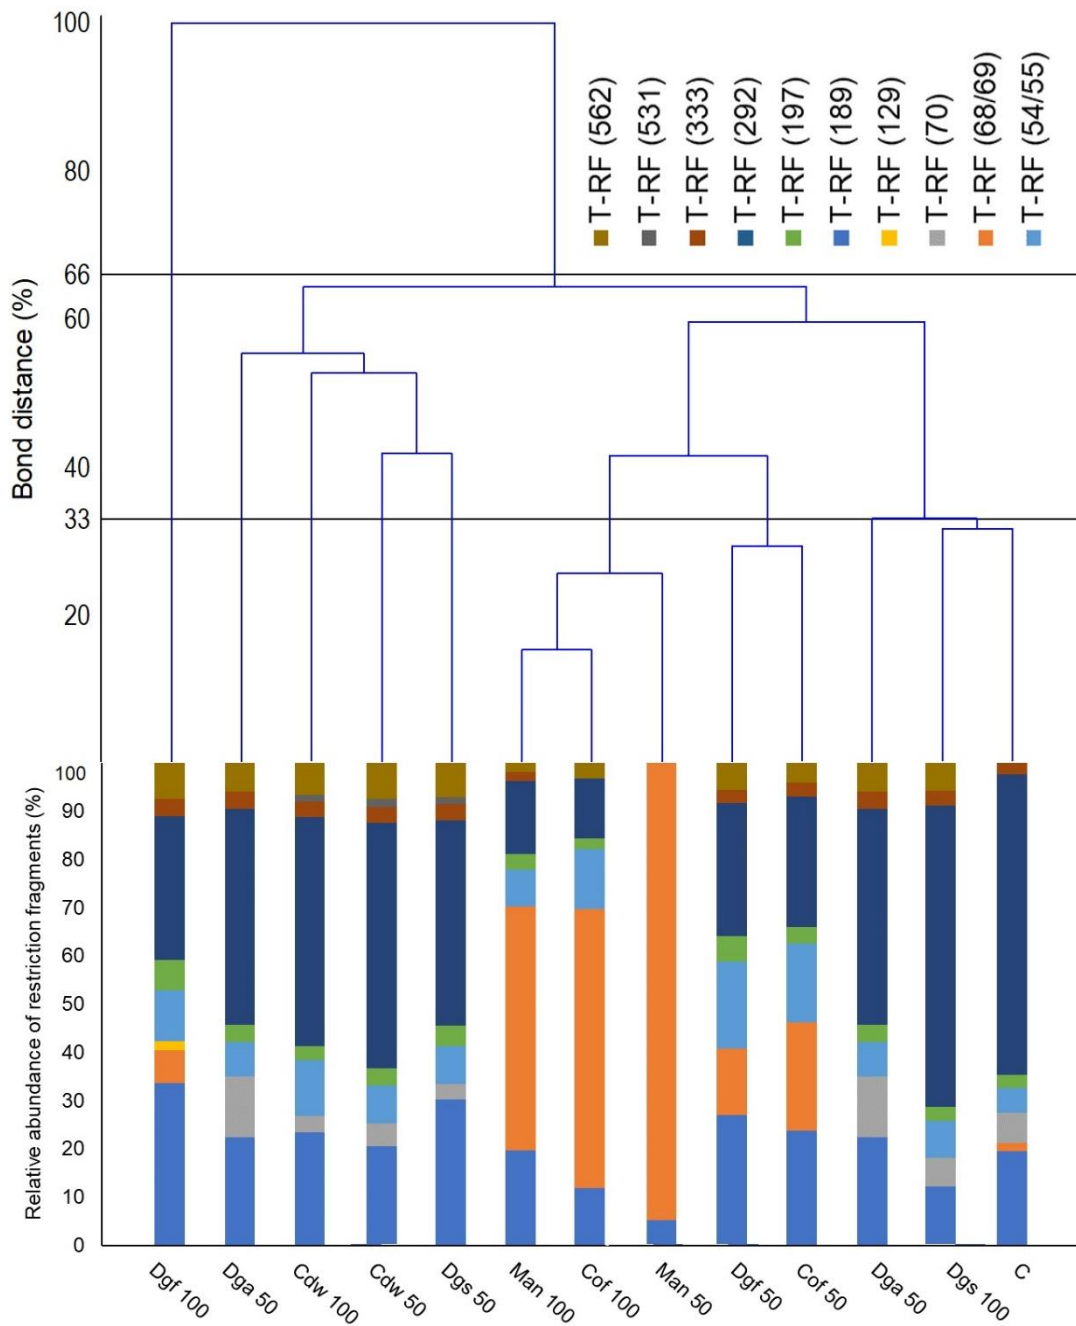

**Figure S3.** T-RFLP dendrogram was obtained using *Csp6I* enzyme digested of *amoA* archaeal gene amplification product. Explanation: C- control, Cof – compost, Man – animal meal, Dgf – digestate from potato waste, Dgs – digestate from sugar beet waste, Dga – digestate from silage maize, Cdw – compost, 50% and 100% of doses.

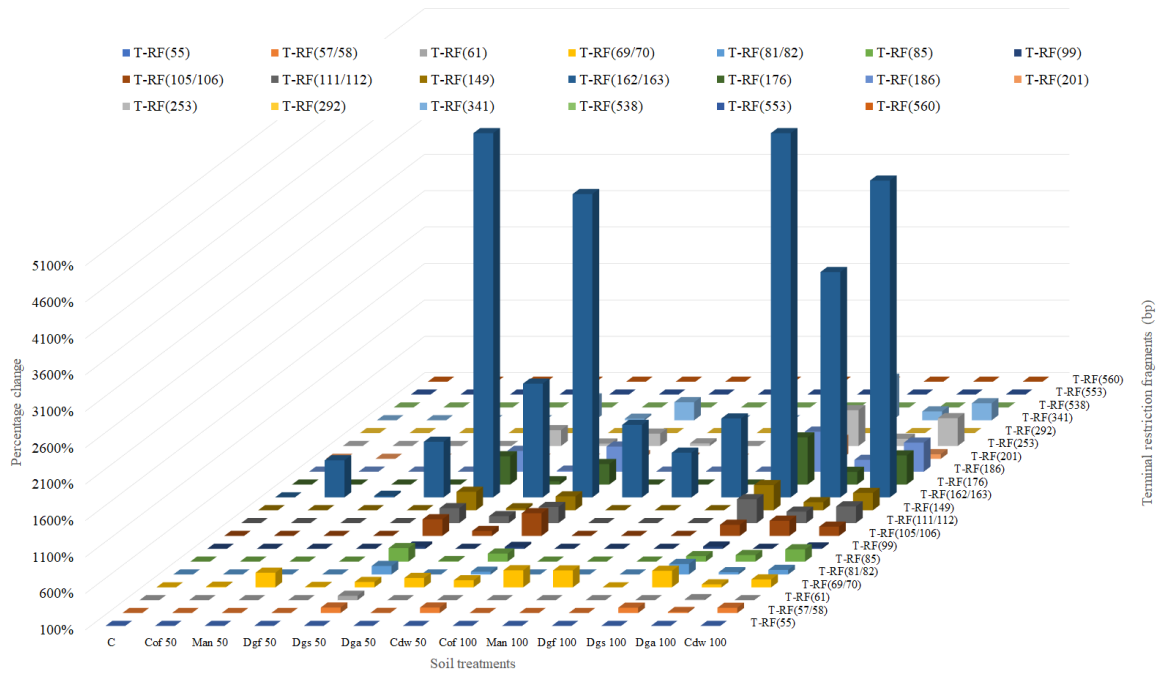

(a)

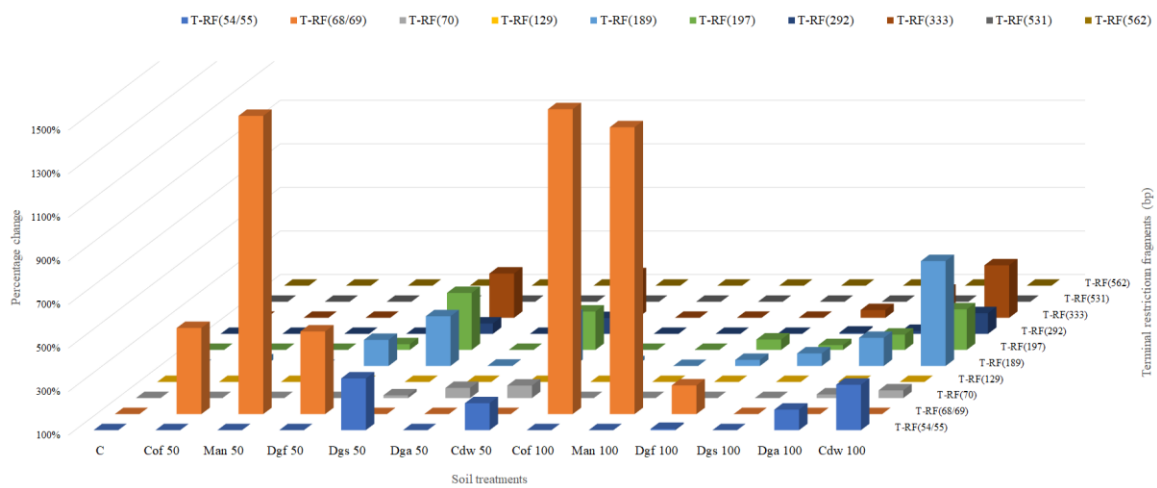

(b)

**Figure S4.** Percentage change in relative abundances of terminal restriction profile. Data sets derived from digestion with: **(a)** *AluI*; **(b)** *Csp6I*. Explanation: C- control, Cof – compost, Man – animal meal, Dgf – digestate from potato waste, Dgs – digestate from sugar beet waste, Dga – digestate from silage maize, Cdw- compost, 50% and 100% of doses.
